# Supplementary material for: SARS-CoV-2 Infection Is an Independent Risk Factor for Decompensation in Cirrhosis Patients
Source: MDPI journal article supplement (doi:10.3390/diseases12030046), 2024-02-25
Supplement: s1 [file s1]

## Supplementary Materials of Methods:

**Table S1. ICD-10 Codes Used in Methodology.**

|                                               |                                              |        |
|-----------------------------------------------|----------------------------------------------|--------|
| <b>• Patient Diagnoses</b>                    |                                              |        |
| Compensated Cirrhosis                         | Alcoholic cirrhosis of liver without ascites | K70.30 |
|                                               | Hepatic fibrosis                             | K74    |
|                                               | Alcoholic cirrhosis of liver                 | K70.3  |
|                                               | Primary biliary cirrhosis                    | K74.3  |
|                                               | Other cirrhosis of liver                     | K74.69 |
|                                               | Unspecified cirrhosis of liver               | K74.60 |
|                                               | Fibrosis and cirrhosis of liver              | K74    |
|                                               | Secondary biliary cirrhosis                  | K74.4  |
|                                               | Biliary cirrhosis, unspecified               | K74.5  |
|                                               | Alcoholic fibrosis and sclerosis of liver    | K70.2  |
| <b>• Outcomes</b>                             |                                              |        |
| Decompensation<br>(Any of the following)      | Esophageal varices without bleeding          | I85.00 |
|                                               | Hepatic failure, unspecified with coma       | K72.91 |
|                                               | Hepatic encephalopathy                       | K76.82 |
|                                               | Esophageal varices with bleeding             | I85.01 |
|                                               | Spontaneous bacterial peritonitis            | K65.2  |
|                                               | Secondary esophageal varices                 | I85.1  |
|                                               | Esophageal varices                           | I85.0  |
|                                               | Esophageal varices                           | I85    |
|                                               | Ascites                                      | R18    |
|                                               | Hepatorenal syndrome                         | K76.7  |
|                                               | Other ascites                                | R18.8  |
|                                               | Alcoholic cirrhosis of liver with ascites    | K70.31 |
| Ascites                                       | Ascites                                      | R18    |
|                                               | Other ascites                                | R18.8  |
|                                               | Alcoholic cirrhosis of liver with ascites    | K70.31 |
| HRS                                           | K76.7                                        |        |
| HE                                            | Encephalopathy, unspecified                  | G93.40 |
|                                               | Hepatic encephalopathy                       | K76.82 |
|                                               | Hepatic failure, unspecified with coma       | K72.91 |
| SBP                                           | K65.2                                        |        |
| Jaundice                                      | R17                                          |        |
| Variceal Bleed                                | Gastric varices                              | I86.4  |
|                                               | Gastrointestinal hemorrhage, unspecified     | K92.2  |
| <b>• Propensity Score Matching Components</b> |                                              |        |
| Coronary Artery Disease                       | I25.1                                        |        |
| Essential Hypertension                        | I10                                          |        |
| Diabetes                                      | E08-E13                                      |        |
| Chronic Kidney Disease                        | N18                                          |        |
| Chronic Obstructive Lung Disease              | J44                                          |        |
